# Supplementary material
Source: HighWire-hosted journal article supplement (https://ebmtp.com/highwire/filestream/136122/field_highwire_adjunct_files/0/blad_85_2006.pdf)
Supplement: blad_85_2006.pdf [file blad_85_2006.pdf]

的完全疼痛缓解持续时间长( $p = 0.001$ )。15例(12%)患者在接受 SRS 治疗后出现新的感觉障碍。

**结论:** 与晚期 SRS 相比,早期 SRS 作为难治性三叉神经痛的初始手术治疗方案可取得更快、更好、更长的疼痛缓解效果。

**证据分级:** 本研究为医学难治性三叉神经痛患者提供了 IV 级证据,早期 SRS 作为初始手术方案可提供更快、更好、更长的疼痛缓解效果。 *Neurology*®2015;85:2159–2165

## 倾斜试验诱发血管迷走性晕厥与精神性假性晕厥 重叠的临床疾病

Helene Blad, MD;Robert Jan Lamberts,PhD;J. Gert van Dijk, PhD;Roland D. Thijs, PhD

**目的:** 旨在描述倾斜试验诱发血管迷走性晕厥 (vasovagal syncope, VVS) 与精神性假性晕厥 (psychogenic pseudosyncope, PPS) 的合并症,并帮助其临床鉴别。

**方法:** 我们自 2 个三级晕厥转诊中心筛选出倾斜试验诱发 VVS/PPS 患者。针对每个病例,在相同中心随机选取 3 例倾斜试验诱发 VVS 作为对照。应用校正后的多重比较法对两组患者的临床特征进行对比。

**结果:** 在 1,164 次倾斜台试验中,有 23 例(2%)诱发了 VVS/PPS;将这 23 个病例与 69 个 VVS 病例进行比较。研究结果显示,VVS 与 PPS 同时发生的概率比预测的概率更高,分别为:2% vs 0.6%, $p < 0.001$ 。所有的 VVS / PPS 患者和对照组 VVS 患者都有典型的 VVS 前驱症状和诱因。VVS / PPS 患者的发作频率(2 次 / 月,范围 0.1~60)显著高于 VVS 对照组的患者(0.25 次 / 月,范围 0.02 ~ 4;  $p < 0.001$ )。VVS/PPS 组意识恢复延迟频率更高 [似然比(likelihood ratio, +LR)8.14, 95% 可信区间(confidence interval, CI)3.94 ~ 16.84], 同样无前驱症状的发作(+LR 5.57, 95% CI 2.53 ~ 12.26)、非典型诱因(+LR 5.00, 95% CI 2.04~12.24)、闭目(+LR 3.75, 95% CI 1.68 ~ 8.35)、明显意识丧失 > 1 分钟(+LR 2.86, 95% CI 1.98 ~ 4.13)的频率均更高。

**结论:** VVS/PPS 具有复杂的表现类型。高频发作、意识恢复延迟、明显意识丧失 >1 分钟、发作性闭目、非典型诱因及无发作前驱症状可作为 PPS 与 VVS 共有的临床表现。 *Neurology*®2015;85:2006–2010

## ADCY5相关的运动障碍 疾病谱和基因型-表现型的相关性

Dong-Hui Chen, MD,PhD;Aurélie Méneret, MD;Jennifer R. Friedman, MD;Olena Korvatska, PhD;Alona Gad, MD;

Emily S. Bonkowski, BS;Holly A. Stessman, PhD;Diane Doummar, MD;Cyril Mignot, MD, PhD;

Mathieu Anheim, MD,PhD;Saunders Bernes, MD;Marie Y. Davis, MD, PhD;Nathalie Damon-Perrière,MD;

Bertrand Degos, MD, PhD;David Grabli, MD, PhD;Domitille Gras, MD;Fuki M. Hisama, MD;Katherine M. Mackenzie,MD;

Phillip D. Swanson, MD,PhD;Christine Tranchant,MD, PhD;Marie Vidailhet, MD;Steven Winesett, MD;

Oriane Trouillard Laura M. Amendola, MS;Michael O. Dorschner, PhD;Michael Weiss, MD;Evan E. Eichler, PhD;

Ali Torkamani, PhD;Emmanuel Roze,MD, PhD;Thomas D. Bird, MD;Wendy H. Raskind, MD,PhD

**目的:** 旨在研究腺苷酸环化酶 5 (ADCY5) 相关运动障碍的临床表现、特征及其基因型 - 表现型间的相关性。

**方法:** 通过外显子或靶序列测序,分析有舞蹈病样或肌张力障碍表现患者的 ADCY5。采用等位基因特定的扩增法对疑似嵌合体进行确认。评估 50 例新发和既往报道病例的临床特征。
